# Supplementary material
Source: ML conference proceedings conference paper supplement (https://openaccess.thecvf.com/content/CVPR2026/html/Pan_LUMINA_A_Multi-Vendor_CVPR_2026_paper.html)
Supplement: Supplementary file 1 [file Pan_LUMINA_A_Multi-Vendor_CVPR_2026_supplemental.pdf]

# LUMINA: A Multi-Vendor Mammography Benchmark with Energy Harmonization Protocol

## Supplementary Material

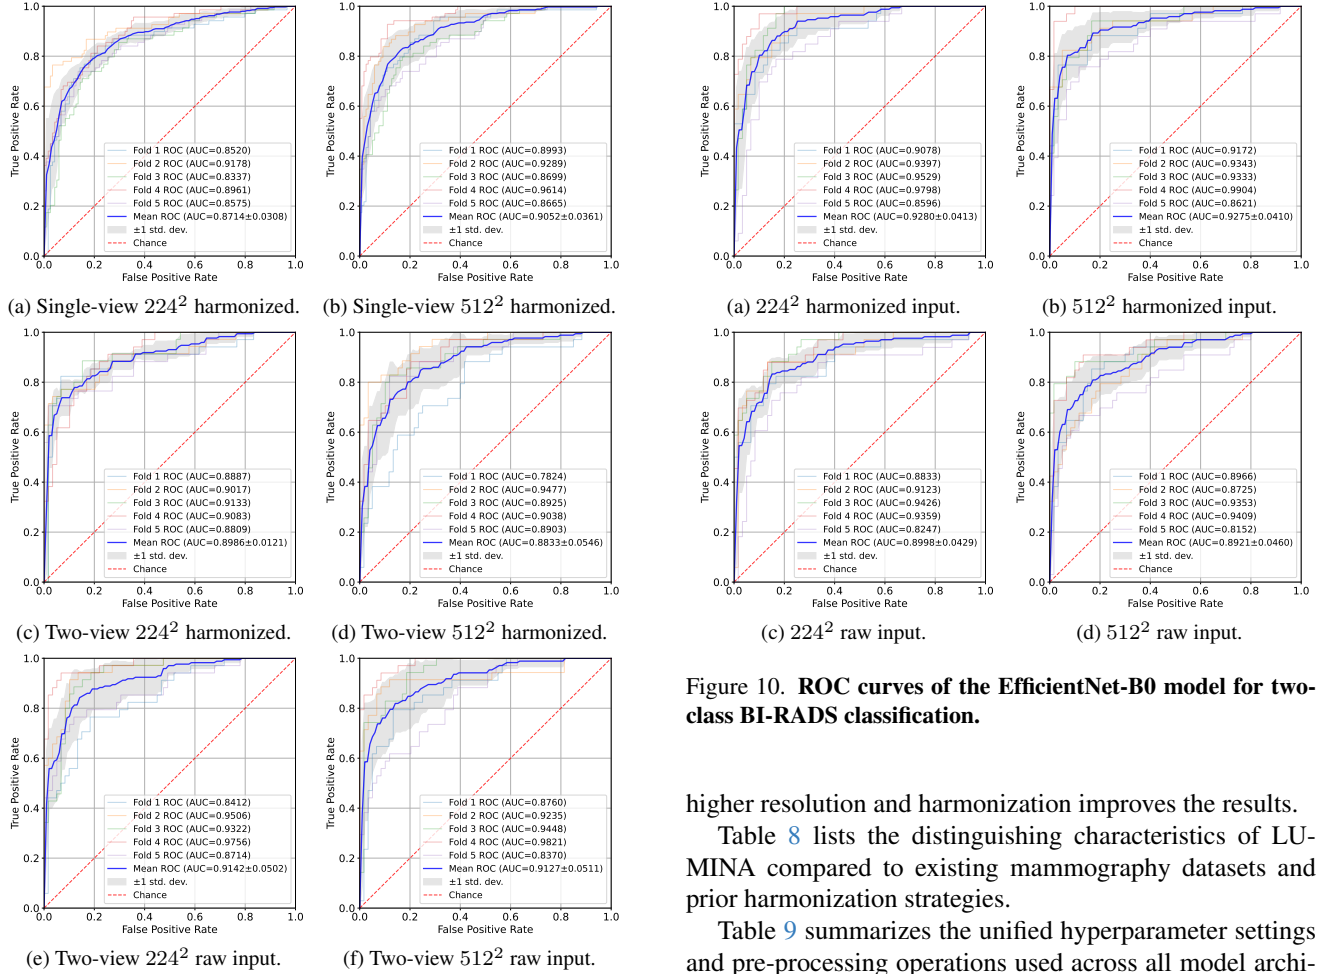

Figure 9. ROC curves of the EfficientNet-B0 model for breast cancer diagnosis.

Fig. 9 shows the ROC curves of EfficientNet-B0 for the breast cancer diagnosis task, where we plot the ROC for each fold and the mean ROC. The two-view model consistently outperforms the single-view variant, demonstrating the benefit of combining CC and MLO information. Higher input resolution ( $512^2$ ) further improves AUC compared to the  $224^2$  setting. In all configurations, object-histogram-based harmonization yields a noticeable upward shift in the ROC curves, confirming its effectiveness in stabilizing image appearance and enhancing diagnostic performance. Fig. 10 shows the ROC curves of EfficientNet-B0 for the two-class BI-RADS classification task. It also supports that

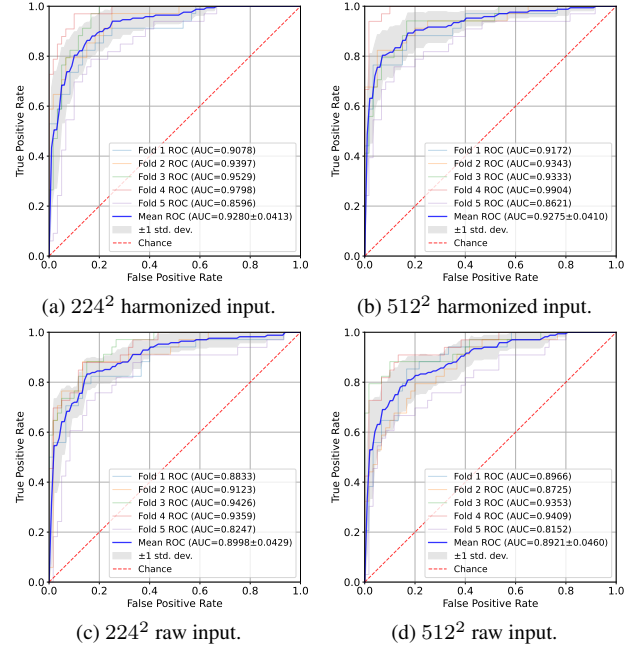

Figure 10. ROC curves of the EfficientNet-B0 model for two-class BI-RADS classification.

higher resolution and harmonization improves the results. Table 8 lists the distinguishing characteristics of LUMINA compared to existing mammography datasets and prior harmonization strategies. Table 9 summarizes the unified hyperparameter settings and pre-processing operations used across all model architectures, respectively. These settings and operations ensured a controlled and fair comparison in our benchmark experiments.

Table 8. **Positioning.** LUMINA provides pathology, BI-RADS, and density on multi-vendor FFDM, plus a simple, effective pixel-space harmonization baseline.

| Family                                    | Examples                                                          | Labels/Supervision                             | Architecture/Objective                                                                                       | Limitations vs. LUMINA                                                                          |
|-------------------------------------------|-------------------------------------------------------------------|------------------------------------------------|--------------------------------------------------------------------------------------------------------------|-------------------------------------------------------------------------------------------------|
| <b>Film (SFM) datasets</b>                | MIAS [31], DDSM [4], CBIS-DDSM [14]                               | Pathology (yes), BI-RADS (varies)              | Early CNNs / CAD; single-task classification                                                                 | Film scans, lower resolution; limited modern FFDM relevance.                                    |
| <b>Digital (FFDM) datasets</b>            | INbreast [20], VinDR-Mammo [23], RSNA [6], CMMD [5], KAU-BCMD [1] | Pathology or BI-RADS; density varies           | CNNs/ViTs; single- or dual-task                                                                              | Often single vendor/system; partial labels; limited multi-task scope.                           |
| <b>Harmonization (feature space)</b>      | ComBat [22]                                                       | Batch-effect correction on features            | Empirical Bayes (location/scale) on radiomics/latent features                                                | Requires feature extraction; not pixel-space; modality-agnostic assumptions.                    |
| <b>Harmonization (federated learning)</b> | HarmoFL [12]                                                      | Federated frequency-domain drift normalization | Joint optimization across clients                                                                            | Heavy infra; task/model coupling; not a simple preproc.                                         |
| <b>LUMINA (Ours)</b>                      | Multi-vendor FFDM (6 systems); energy meta-data                   | Pathology + BI-RADS + density                  | <i>Foreground-only</i> pixel-space CDF matching + unified 3-task benchmark; single-/two-/four-view baselines | Vendor/energy diversity; three tasks; consistent harmonization gains; improved attention focus. |

Table 9. **Hyperparameter parity across backbones.** Shared schedule and augmentations ensure a fair comparison (see Sec. 6.1).

| Backbone        | Pre-trained | Learning Rate      | Weight Decay       | Epochs | Learning Rate scheduler | Batch | Augmentation |
|-----------------|-------------|--------------------|--------------------|--------|-------------------------|-------|--------------|
| ResNet-50       | ImageNet-1K | $1 \times 10^{-3}$ | $1 \times 10^{-5}$ | 100    | $\times 0.1$ every 30   | 32    | flip, resize |
| DenseNet-121    | ImageNet-1K | $1 \times 10^{-3}$ | $1 \times 10^{-5}$ | 100    | $\times 0.1$ every 30   | 32    | flip, resize |
| EfficientNet-B0 | ImageNet-1K | $1 \times 10^{-3}$ | $1 \times 10^{-5}$ | 100    | $\times 0.1$ every 30   | 32    | flip, resize |
| Swin-T          | ImageNet-1K | $1 \times 10^{-5}$ | $1 \times 10^{-5}$ | 100    | $\times 0.1$ every 30   | 32    | flip, resize |

Table 10. **Shared pre-processing.** Ensures identical inputs across backbones; isolates model differences.

| Stage            | Operation (applied to all models equally)                                                           |
|------------------|-----------------------------------------------------------------------------------------------------|
| DICOM handling   | Convert MONOCHROME1 to MONOCHROME2; remove text burn-ins.                                           |
| Foreground mask  | Define $M = \{(x, y) \mid \mathbf{I}(x, y) > 0\}$ ; exclude background from histograms.             |
| Harmonization    | Foreground CDF matching to low-energy reference (Eqs. 1–8); training-free, model-agnostic.          |
| Resize/replicate | Resize to $224^2$ or $512^2$ ; replicate grayscale to 3 channels for ImageNet backbones (Sec. 6.1). |
| Augment          | Random horizontal flip (all backbones, all tasks).                                                  |
| Normalization    | As in backbone defaults; no per-model special tuning beyond LR noted in Sec. 6.1.                   |
